# Supplementary material for: Using natural language processing and machine learning to identify breast cancer local recurrence
Source: BMC Bioinformatics. 2018 Dec 28;19(Suppl 17):498. doi: 10.1186/s12859-018-2466-x (PMC6309052; doi:10.1186/s12859-018-2466-x)
Supplement: Supplementary file 2 — Table S2. Positive CUIS. A dictionary of CUISs and the corresponding CUI preferred name that were retained after filtering. (XLS 23 kb) [file 12859_2018_2466_MOESM2_ESM.xls]

## Sheet: Table S2
Table S2: A dictionary of CUISs and the corresponding CUI preferred name that were retained after filtering
Recurrence	C0034897
Recurrence (disease attribute)	C2825055
Recurrent breast cancer	C0278493
Noninfiltrating Intraductal Carcinoma	C0007124
Recurrent Malignant Neoplasm	C1458156
Breast Carcinoma	C0678222
Recurrent	C2945760
Invasive Ductal Breast Carcinoma	C1134719
Chest wall structure	C0205076
Right	C0205090
Right sided	C0444532
Left	C0205091
Left sided	C0443246
Left breast	C0222601
cancer recurrence	C0920420
Simple mastectomy	C0024886
Malignant neoplasm of breast	C0006142
Mammary Ductal Carcinoma	C0021367
Right breast	C0222600
Entire breast	C1268990
Mastectomy	C0024881
Entire chest wall	C1279035
Right-Sided Breast Neoplasms	C4042789
Invasive	C0205281
Invasive Lesion	C1334278
Excision of breast tissue	C0191849
Recurrent disease	C0277556
History of malignant neoplasm of breast	C1997028
Personal history of primary malignant neoplasm of breast	C1387407
left Mastectomy	C2223264
Ipsilateral	C0441989
Ductal	C1512083
Entire lateral chest wall	C3696933
Infiltration	C0332448
History of mastectomy	C1997869
Ductal Breast Carcinoma	C1527349
disease recurrence	C0679254
Female Breast Carcinoma	C0007104
Malignant neoplasm of female breast	C0235653
Cancer excision	C0853109
cancer resection	C0741886
right Mastectomy	C2223263
Grade three rank	C0450094
newly	C0750546
History of present illness	C0262512
History of previous events	C2004062
Malignant Neoplasms	C0006826
Primary malignant neoplasm	C1306459
